# Supplementary material for: Functional comparison of PBMCs isolated by Cell Preparation Tubes (CPT) vs. Lymphoprep Tubes
Source: BMC Immunol. 2020 Mar 30;21:15. doi: 10.1186/s12865-020-00345-0 (PMC7106580; doi:10.1186/s12865-020-00345-0)
Supplement: Supplementary file 2 — Additional file 2: Table S1. Statistical analysis shows choice of CPT or LP method is not the major contributor to variance for yield, and recovery. Anova variance for contribution of donor, method (CPT or LP), and operator on cell yield pre-freeze, cell yield post-freeze, and recovery measured by Sysmex XE-2100 automated hematology analyzer. Sum squares, sum square contributions, F values, and P values are shown for each parameter measured (rows). [file 12865_2020_345_MOESM2_ESM.xlsx]

## Sheet: Sheet1
Table S1
Yield
		Wilcoxon P Value	Sum Square	Sum Square Contribution	ANOVA F Value	ANOVA P Value
Cells/mL Pre Freeze
	Method	0.570312	78309031250	0.235771	1.08965	0.317123
	Donor		210690000000	0.634342	1.46585	0.269422
	Operator		43140562500	0.129887	0.300144	0.746113
Cells/mL Post Freeze
	Method	0.359375	48672000000	0.160565	1.06114	0.323271
	Donor		82931250000	0.273583	0.904028	0.430816
	Operator		171527000000	0.565852	1.86981	0.196392
% Recovery
	Method	0.734375	0.00159702	0.0324961	0.164398	0.692275
	Donor		0.000180506	0.00367293	0.0092907	0.990759
	Operator		0.0473675	0.963831	2.43801	0.129261
